# Supplementary material for: Parallel evolution of conserved non-coding elements that target a common set of developmental regulatory genes from worms to humans
Source: PubMed Central journal article supplement (PMC1852409; doi:10.1186/gb-2007-8-2-r15), 2007-02-02

**Figure S1.** The distribution of wCNEs along each chromosome reveals clustering in the centres of autosomes. The cumulative wCNE occurrence (y-axis) is shown along each of the *C. elegans* chromosomes (x-axis).

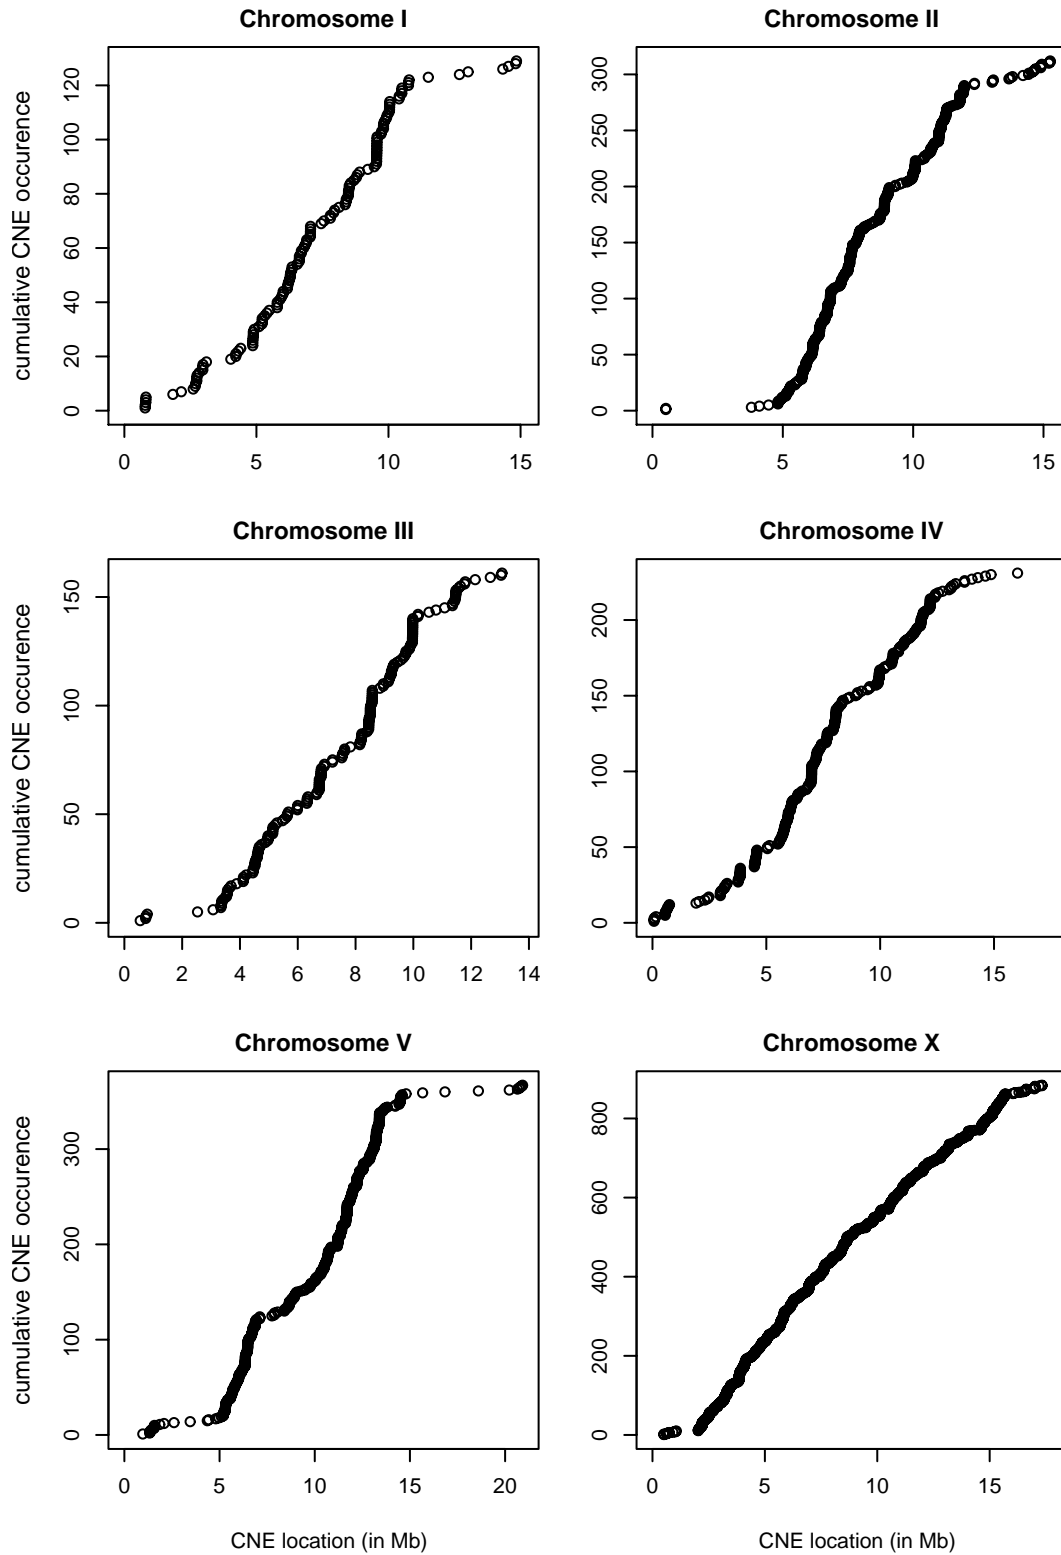

Supplement: gb-2007-8-2-r15-S1.pdf [file gb-2007-8-2-r15-S1.pdf]
