# Supplementary material for: Parallel evolution of conserved non-coding elements that target a common set of developmental regulatory genes from worms to humans
Source: PubMed Central journal article supplement (PMC1852409; doi:10.1186/gb-2007-8-2-r15), 2007-02-02
Supplement: gb-2007-8-2-r15-S4.pdf [file gb-2007-8-2-r15-S4.pdf]

**Table S1.** Protein domains significantly enriched in CNE-associated genes compared to the rest of the genes in the *H. sapiens* (a) and the *C. elegans* (b) genome. The domains shown in the two tables below constitute all top-level InterPro domains with a positive log odds ratio (LOR) that are significantly associated with CNE-genes and are found in at least 10 genes in either the *H. sapiens* or the *C. elegans* genome. The total number of proteins annotated with at least one InterPro domain was 12,946 in the *C. elegans* genome and 17,801 in the human genome. Protein domain titles in bold are significantly enriched in both CNE-associated gene sets. To account for multiple comparisons, we calculated the p-value threshold at the 5% FDR cut-off using the false discovery rate method by Benjamini and Hochberg [2] (threshold  $p = 3.6e-3$ ). CI: Confidence interval.

key: **DNA-binding domain**

**Domain commonly found in DNA-binding proteins**

**Signalling protein domain**

**Domain commonly found in signalling proteins**

**Domain found in both DNA-binding and signalling proteins**

**Other domain/ domain found in many diverse proteins**

| (a) InterPro domain                             | CNE-genes with domain in human | All genes with domain in human | LOR ( $\pm$ CI)    | P-value   |
|-------------------------------------------------|--------------------------------|--------------------------------|--------------------|-----------|
| POU                                             | 24                             | 86                             | 3.14 ( $\pm$ 0.48) | < 2.2e-16 |
| <b>Homeodomain-like</b>                         | 63                             | 323                            | 2.80 ( $\pm$ 0.30) | < 2.2e-16 |
| Antifreeze protein, type I                      | 23                             | 176                            | 2.19 ( $\pm$ 0.45) | < 2.2e-16 |
| <b>HMG1/2 (high mobility group) box</b>         | 10                             | 69                             | 2.27 ( $\pm$ 0.67) | 1.22e-011 |
| Paired-like homeodomain protein, OAR            | 5                              | 15                             | 3.34 ( $\pm$ 1.04) | 1.48e-010 |
| <b>Zinc finger, C2H2-type</b>                   | 38                             | 805                            | 1.09 ( $\pm$ 0.34) | 2.63e-010 |
| <b>Eggshell protein</b>                         | 10                             | 82                             | 2.07 ( $\pm$ 0.66) | 3.43e-010 |
| Steroid hormone receptor                        | 13                             | 156                            | 1.65 ( $\pm$ 0.57) | 6.78e-009 |
| Basic helix-loop-helix dimerisation region bHLH | 10                             | 109                            | 1.75 ( $\pm$ 0.65) | 5.68e-008 |
| Ribosomal protein P2                            | 6                              | 42                             | 2.24 ( $\pm$ 0.84) | 9.30e-008 |
| Vitamin D receptor                              | 6                              | 47                             | 2.11 ( $\pm$ 0.83) | 3.64e-007 |
| Nuclear hormone receptor, DNA-binding           | 6                              | 47                             | 2.11 ( $\pm$ 0.83) | 3.64e-007 |
| Steroid nuclear receptor, ligand-binding        | 6                              | 49                             | 2.06 ( $\pm$ 0.83) | 5.97e-007 |
| Prion protein                                   | 4                              | 23                             | 2.47 ( $\pm$ 1.03) | 1.37e-006 |
| <b>LIM, zinc-binding</b>                        | 7                              | 74                             | 1.77 ( $\pm$ 0.76) | 2.58e-006 |
| Pollen allergen Poa pIX/Phl pVI, C-terminal     | 5                              | 40                             | 2.08 ( $\pm$ 0.91) | 3.27e-006 |
| Fos transforming protein                        | 3                              | 26                             | 1.99 ( $\pm$ 1.13) | 2.82e-004 |
| UDENN                                           | 2                              | 13                             | 2.31 ( $\pm$ 1.37) | 4.73e-004 |

|                                            |    |      |                     |           |
|--------------------------------------------|----|------|---------------------|-----------|
| p53-like transcription factor, DNA-binding | 2  | 13   | 2.31 ( $\pm 1.37$ ) | 4.73e-004 |
| Ricin B lectin                             | 3  | 31   | 1.79 ( $\pm 1.12$ ) | 8.41e-004 |
| Cell surface receptor IPT/TIG              | 3  | 31   | 1.79 ( $\pm 1.12$ ) | 8.41e-004 |
| Cytokine receptor class 2                  | 2  | 15   | 2.15 ( $\pm 1.35$ ) | 9.40e-004 |
| DDENN                                      | 2  | 15   | 2.15 ( $\pm 1.35$ ) | 9.40e-004 |
| Involucrin repeat                          | 2  | 15   | 2.15 ( $\pm 1.35$ ) | 9.40e-004 |
| DENN                                       | 2  | 16   | 2.07 ( $\pm 1.35$ ) | 1.27e-003 |
| Winged helix repressor DNA-binding         | 7  | 139  | 1.09 ( $\pm 0.74$ ) | 2.02e-003 |
| Ion transport                              | 8  | 173  | 1.00 ( $\pm 0.70$ ) | 2.43e-003 |
| Proline-rich region                        | 33 | 1185 | 0.50 ( $\pm 0.36$ ) | 3.29e-003 |
| Haloacid dehalogenase-like hydrolase       | 3  | 40   | 1.51 ( $\pm 1.10$ ) | 3.62e-003 |

| (b) InterPro domain                             | wCNE-genes with domain in <i>C. elegans</i> | All genes with domain in <i>C. elegans</i> | LOR ( $\pm$ CI)     | P-value   |
|-------------------------------------------------|---------------------------------------------|--------------------------------------------|---------------------|-----------|
| Fibronectin, type III                           | 19                                          | 46                                         | 2.29 ( $\pm 0.58$ ) | 7.44e-015 |
| Immunoglobulin-like                             | 23                                          | 77                                         | 1.79 ( $\pm 0.49$ ) | 3.20e-013 |
| Homeodomain-like                                | 32                                          | 139                                        | 1.45 ( $\pm 0.40$ ) | 5.81e-013 |
| Immunoglobulin C2 type                          | 16                                          | 45                                         | 2.05 ( $\pm 0.61$ ) | 1.91e-011 |
| K <sup>+</sup> channel, pore region             | 22                                          | 85                                         | 1.59 ( $\pm 0.49$ ) | 6.63e-011 |
| Ion transport                                   | 18                                          | 61                                         | 1.77 ( $\pm 0.55$ ) | 1.24e-010 |
| Immunoglobulin subtype                          | 11                                          | 29                                         | 2.14 ( $\pm 0.74$ ) | 6.66e-009 |
| EGF-like, type 3                                | 21                                          | 97                                         | 1.36 ( $\pm 0.48$ ) | 1.92e-008 |
| Winged helix repressor DNA-binding              | 16                                          | 63                                         | 1.56 ( $\pm 0.56$ ) | 2.94e-008 |
| Endoglin/CD105 antigen                          | 12                                          | 39                                         | 1.82 ( $\pm 0.67$ ) | 5.14e-008 |
| Zinc finger, C2H2-type                          | 36                                          | 230                                        | 0.97 ( $\pm 0.36$ ) | 7.51e-008 |
| EGF-like                                        | 30                                          | 180                                        | 1.04 ( $\pm 0.40$ ) | 1.36e-007 |
| PDZ/DHR/GLGF                                    | 16                                          | 68                                         | 1.46 ( $\pm 0.56$ ) | 1.43e-007 |
| Pleckstrin-like                                 | 15                                          | 71                                         | 1.32 ( $\pm 0.57$ ) | 2.46e-006 |
| Rho GTPase activation protein                   | 8                                           | 26                                         | 1.82 ( $\pm 0.82$ ) | 5.96e-006 |
| Laminin G                                       | 6                                           | 15                                         | 2.23 ( $\pm 1.00$ ) | 6.48e-006 |
| Cadherin                                        | 5                                           | 10                                         | 2.63 ( $\pm 1.18$ ) | 6.70e-006 |
| Laminin G, Thrombospondin-type, N terminal      | 6                                           | 16                                         | 2.12 ( $\pm 0.98$ ) | 1.14e-005 |
| DM DNA-binding                                  | 5                                           | 11                                         | 2.45 ( $\pm 1.14$ ) | 1.24e-005 |
| LIM, zinc-binding                               | 8                                           | 29                                         | 1.67 ( $\pm 0.80$ ) | 2.08e-005 |
| Apple-like                                      | 7                                           | 23                                         | 1.80 ( $\pm 0.87$ ) | 2.21e-005 |
| Sterile alpha motif homology                    | 6                                           | 18                                         | 1.94 ( $\pm 0.95$ ) | 3.23e-005 |
| RA                                              | 5                                           | 13                                         | 2.16 ( $\pm 1.07$ ) | 4.11e-005 |
| EGF                                             | 14                                          | 76                                         | 1.15 ( $\pm 0.58$ ) | 4.67e-005 |
| K <sup>+</sup> channel, two pore                | 9                                           | 41                                         | 1.36 ( $\pm 0.73$ ) | 1.17e-004 |
| Aspartic acid and asparagine hydroxylation site | 8                                           | 34                                         | 1.45 ( $\pm 0.78$ ) | 1.21e-004 |
| HMG1/2 (high mobility group) box                | 5                                           | 15                                         | 1.94 ( $\pm 1.03$ ) | 1.21e-004 |

|                                                                |    |    |                     |           |
|----------------------------------------------------------------|----|----|---------------------|-----------|
| Ras GTPase                                                     | 13 | 73 | 1.10 ( $\pm 0.59$ ) | 1.33e-004 |
| C2 calcium/lipid-binding region, CaLB                          | 10 | 49 | 1.27 ( $\pm 0.68$ ) | 1.34e-004 |
| Peptidase M12B, ADAM/reprolysin                                | 4  | 11 | 2.07 ( $\pm 1.17$ ) | 2.67e-004 |
| Src homology-3                                                 | 11 | 61 | 1.12 ( $\pm 0.64$ ) | 3.32e-004 |
| Band 7 protein                                                 | 4  | 12 | 1.94 ( $\pm 1.14$ ) | 4.61e-004 |
| Thrombospondin, type I                                         | 8  | 39 | 1.28 ( $\pm 0.76$ ) | 5.03e-004 |
| Spectrin repeat                                                | 5  | 20 | 1.53 ( $\pm 0.98$ ) | 1.05e-003 |
| Peptidase M, neutral zinc metallopeptidases, zinc-binding site | 14 | 95 | 0.88 ( $\pm 0.56$ ) | 1.11e-003 |
| Pleckstrin homology-type                                       | 5  | 22 | 1.40 ( $\pm 0.96$ ) | 2.07e-003 |
| EGF-like, laminin                                              | 4  | 16 | 1.53 ( $\pm 1.08$ ) | 2.75e-003 |
| <b>Eggshell protein</b>                                        | 3  | 10 | 1.78 ( $\pm 1.27$ ) | 3.02e-003 |
| Actin-binding, actinin-type                                    | 3  | 10 | 1.78 ( $\pm 1.27$ ) | 3.02e-003 |
