# Supplementary material for: Parallel evolution of conserved non-coding elements that target a common set of developmental regulatory genes from worms to humans
Source: PubMed Central journal article supplement (PMC1852409; doi:10.1186/gb-2007-8-2-r15), 2007-02-02
Supplement: gb-2007-8-2-r15-S5.pdf [file gb-2007-8-2-r15-S5.pdf]

**Table S2.** Transcription factors are significantly enriched among genes associated with wCNEs. We have used two high-quality transcription factor prediction databases to annotate wCNE-associated genes. DBD is a database of transcription factors predicted through homology to domains of known sequence-specific DNA-binding transcription factors [1]. The *C. elegans* genes analysed in DBD correspond to WormBase release WS150. wTF2.0 is a compendium of computationally predicted and manually curated transcription factors [2]. The *C. elegans* genes analysed in wTF2.0 correspond to WormBase release WS140. Using both databases we have found that the set of genes associated with wCNEs contains a significantly higher proportion of predicted transcription factors than the rest of the genes in the genome. The total number of genes associated with wCNEs is 1,241.

| <b>Database of predicted transcription factors</b>                               | <b>DBD [1]</b>        | <b>wTF2.0[2]</b>      |
|----------------------------------------------------------------------------------|-----------------------|-----------------------|
| Number of genes coding for transcription factors associated with wCNEs           | 108                   | 137                   |
| Number of genes coding for transcription factors in the <i>C. elegans</i> genome | 723                   | 934                   |
| Total number of genes considered in the <i>C. elegans</i> genome                 | 20,053                | 19,735                |
| Log odds ratio                                                                   | 1.037 ( $\pm 0.213$ ) | 1.014 ( $\pm 0.191$ ) |
| P-value                                                                          | $< 2.2e-16$           | $< 2.2e-16$           |

#### References

1. Kummerfeld SK, Teichmann SA: **DBD: a transcription factor prediction database.** *Nucleic Acids Res* 2006, **34**(Database issue):D74-81.
2. Reece-Hoyes JS, Deplancke B, Shingles J, Grove CA, Hope IA, Walhout AJ: **A compendium of *Caenorhabditis elegans* regulatory transcription factors: a resource for mapping transcription regulatory networks.** *Genome Biol* 2005, **6**(13):R110.
