# Supplementary material for: Parallel evolution of conserved non-coding elements that target a common set of developmental regulatory genes from worms to humans
Source: PubMed Central journal article supplement (PMC1852409; doi:10.1186/gb-2007-8-2-r15), 2007-02-02
Supplement: gb-2007-8-2-r15-S6.pdf [file gb-2007-8-2-r15-S6.pdf]

**Table S3.** Overlap of wCNEs with known *cis*-regulatory elements. The genes shown in this table were extracted from literature searches for dissected *cis*-regulatory elements. For each gene, we show the number of spatially associated wCNEs (plus the additional wCNE associated with *lir-1*), the number of wCNEs that overlap dissected *cis*-elements and the references in which the experiments are described. In the case of *lin-26*, there is one wCNE, which is closer to the *lir-1* transcription start site than *lin-26*, so it was associated with *lir-1* in our dataset, however experiments showed that it is likely to be a *lin-26* distal *cis*-element.

| <b>Gene</b>   | <b>Number of wCNEs</b>                          | <b>Number of wCNEs that overlap experimentally tested sequences showing <i>cis</i>-regulatory activity</b> | <b>Ref.</b> |
|---------------|-------------------------------------------------|------------------------------------------------------------------------------------------------------------|-------------|
| <i>myo-2</i>  | 1                                               | 1                                                                                                          | [1]         |
| <i>lin-26</i> | 3 (+ 1 spatially associated with <i>lir-1</i> ) | 3 (+1)                                                                                                     | [2]         |
| <i>ceh-22</i> | 2                                               | 1 (the other wCNE is intronic)                                                                             | [3]         |
| <i>ser-2</i>  | 5                                               | 5                                                                                                          | [4]         |
| <i>ric-4</i>  | 1                                               | 1                                                                                                          | [5]         |
| <i>egl-5</i>  | 1                                               | 0 (wCNE lies downstream)                                                                                   | [6]         |
| <i>ttx-3</i>  | 0                                               | -                                                                                                          | [4]         |
| <i>sra-11</i> | 0                                               | -                                                                                                          | [4]         |
| <i>kal-1</i>  | 0                                               | -                                                                                                          | [4]         |
| <i>hen-1</i>  | 0                                               | -                                                                                                          | [4]         |
| <i>unc-17</i> | 0                                               | -                                                                                                          | [4]         |
| <i>ceh-10</i> | 0                                               | -                                                                                                          | [4]         |
| <i>ceh-23</i> | 0                                               | -                                                                                                          | [4]         |
| <i>dpy-7</i>  | 0                                               | -                                                                                                          | [7]         |
| <i>egl-17</i> | 0                                               | -                                                                                                          | [8]         |
| <i>mec-3</i>  | 0                                               | -                                                                                                          | [9]         |
| <i>her-1</i>  | 0                                               | -                                                                                                          | [10]        |

## References

1. Kalb JM, Beaster-Jones L, Fernandez AP, Okkema PG, Goszczynski B, McGhee JD: **Interference between the PHA-4 and PEB-1 transcription factors in formation of the *Caenorhabditis elegans* pharynx.** *J Mol Biol* 2002, **320**(4):697-704.
2. Landmann F, Quintin S, Labouesse M: **Multiple regulatory elements with spatially and temporally distinct activities control the expression of the epithelial differentiation gene *lin-26* in *C. elegans*.** *Dev Biol* 2004, **265**(2):478-490.
3. Vilimas T, Abraham A, Okkema PG: **An early pharyngeal muscle enhancer from the *Caenorhabditis elegans* *ceh-22* gene is targeted by the Forkhead factor PHA-4.** *Dev Biol* 2004, **266**(2):388-398.
4. Wenick AS, Hobert O: **Genomic cis-regulatory architecture and trans-acting regulators of a single interneuron-specific gene battery in *C. elegans*.** *Dev Cell* 2004, **6**(6):757-770.
5. Hwang SB, Lee J: **Neuron cell type-specific SNAP-25 expression driven by multiple regulatory elements in the nematode *Caenorhabditis elegans*.** *J Mol Biol* 2003, **333**(2):237-247.
6. Teng Y, Girard L, Ferreira HB, Sternberg PW, Emmons SW: **Dissection of cis-regulatory elements in the *C. elegans* Hox gene *egl-5* promoter.** *Dev Biol* 2004, **276**(2):476-492.
7. Gilleard JS, Barry JD, Johnstone IL: **cis regulatory requirements for hypodermal cell-specific expression of the *Caenorhabditis elegans* cuticle collagen gene *dpy-7*.** *Mol Cell Biol* 1997, **17**(4):2301-2311.
8. Cui M, Han M: **Cis regulatory requirements for vulval cell-specific expression of the *Caenorhabditis elegans* fibroblast growth factor gene *egl-17*.** *Dev Biol* 2003, **257**(1):104-116.
9. Xue D, Finney M, Ruvkun G, Chalfie M: **Regulation of the *mec-3* gene by the *C. elegans* homeoproteins *UNC-86* and *MEC-3*.** *Embo J* 1992, **11**(13):4969-4979.
10. Li W, Streit A, Robertson B, Wood WB: **Evidence for multiple promoter elements orchestrating male-specific regulation of the *her-1* gene in *Caenorhabditis elegans*.** *Genetics* 1999, **152**(1):237-248.
