# Supplementary material for: Parallel evolution of conserved non-coding elements that target a common set of developmental regulatory genes from worms to humans
Source: PubMed Central journal article supplement (PMC1852409; doi:10.1186/gb-2007-8-2-r15), 2007-02-02
Supplement: gb-2007-8-2-r15-S7.pdf [file gb-2007-8-2-r15-S7.pdf]

**Table S4.** WormBase annotation features used to annotate wCNEs. Conserved elements in *C. elegans* were annotated according to the type of WormBase annotation feature they overlapped (WS140). wCNEs are elements that do not overlap any of the following genomic features or they lie entirely within introns of protein-coding genes and do not overlap “Exon” type of features (indicated by an asterisk). wCNEs were also filtered for repeats and non-coding RNAs.

| <b>Brief annotation</b> | <b>WormBase annotation feature</b> |                                   | <b>Exon</b> |
|-------------------------|------------------------------------|-----------------------------------|-------------|
| Protein coding          |                                    |                                   |             |
| primary transcript      | Coding_transcript                  | protein_coding_primary_transcript |             |
| Other transcribed       |                                    |                                   |             |
| & repeats               | BLAT_NEMATODE                      | translated_nucleotide_match       | *           |
|                         | Coding_transcript                  | coding_exon                       | *           |
|                         | curated                            | CDS                               |             |
|                         | curated                            | coding_exon                       | *           |
|                         | wublastx                           | protein_match                     | *           |
|                         | BLAT_ncRNA_BEST                    | nucleotide_match                  | *           |
|                         | BLAT_ncRNA_OTHER                   | nucleotide_match                  | *           |
|                         | miRNA                              | exon                              | *           |
|                         | miRNA                              | miRNA_primary_transcript          |             |
|                         | Non_coding_transcript              | exon                              | *           |
|                         | Non_coding_transcript              | nc_primary_transcript             |             |
|                         | rRNA                               | exon                              | *           |
|                         | rRNA                               | rRNA_primary_transcript           |             |
|                         | scRNA                              | exon                              | *           |
|                         | scRNA                              | scRNA_primary_transcript          |             |
|                         | snoRNA                             | exon                              | *           |
|                         | snoRNA                             | snoRNA_primary_transcript         |             |
|                         | snRNA                              | exon                              | *           |
|                         | snRNA                              | snRNA_primary_transcript          |             |
|                         | tRNAscan-SE-1.23                   | exon                              | *           |
|                         | tRNAscan-SE-1.23                   | tRNA_primary_transcript           |             |
|                         | Genefinder                         | CDS                               |             |
|                         | Genefinder                         | coding_exon                       | *           |
|                         | Genefinder                         | exon                              | *           |
|                         | history                            | CDS                               |             |
|                         | history                            | coding_exon                       | *           |
|                         | history                            | exon                              | *           |
|                         | history                            | Transcript                        |             |
|                         | history                            | Pseudogene                        |             |
|                         | Pseudogene                         | exon                              | *           |
|                         | Pseudogene                         | Pseudogene                        |             |
|                         | inverted                           | inverted_repeat                   |             |
|                         | RepeatMasker                       | repeat_region                     |             |
|                         | tandem                             | tandem_repeat                     |             |

---

|        |                   |                                   |   |
|--------|-------------------|-----------------------------------|---|
|        | BLAT_EST_BEST     | EST_match                         | * |
|        | BLAT_EST_OTHER    | EST_match                         | * |
|        | BLAT_mRNA_BEST    | cDNA_match                        | * |
|        | BLAT_mRNA_OTHER   | cDNA_match                        | * |
|        | BLAT_OST_BEST     | expressed_sequence_match          | * |
|        | BLAT_OST_OTHER    | expressed_sequence_match          | * |
|        | Coding_transcript | exon                              | * |
|        | Coding_transcript | five_prime_UTR                    | * |
|        | Coding_transcript | protein_coding_primary_transcript |   |
|        | Coding_transcript | three_prime_UTR                   | * |
|        | Curated           | exon                              | * |
|        | Gene              | gene                              |   |
|        | Operon            | operon                            |   |
|        | SAGE_transcript   | transcript                        |   |
|        | TEC_RED           | nucleotide_match                  |   |
|        | BLAT_TC1_BEST     | nucleotide_match                  |   |
|        | BLAT_TC1_OTHER    | nucleotide_match                  |   |
|        | Transposon        | transposable_element              |   |
|        | Transposon_CDS    | coding_exon                       | * |
|        | Transposon_CDS    | exon                              | * |
|        | Transposon_CDS    | transposable_element              |   |
|        | twinscan          | CDS                               |   |
|        | twinscan          | coding_exon                       | * |
|        | twinscan          | exon                              | * |
| Intron | Coding_transcript | intron                            |   |
|        | Curated           | intron                            |   |

---
